# Supplementary material for: "I need help from other family members" Views and expectations of family carers of people living with dementia on in-home respite care in Northwest China
Source: Research Square preprint supplement (doi:10.21203/rs.3.rs-6282727/v1), 2025-05-29
Supplement: Supplementary file 1 [file f1a0da257cd70ca7007f5927.pdf]

## **Interview Guide**

The first step is to introduce yourself to the research participant and explain again the purpose and significance of the study and the process and approximate time required for this interview.

The second step is to inform the interviewee that this interview will be audio recorded, but that any information related to them will be anonymized and that they have the right to terminate the interview at any time during and after the interview.

The third step is to find out about the interviewee's real caregiving experiences and perceptions based on the following questions :1) Tell me about your daily life from morning to night caring for your relative with dementia; 2) How do you feel about caring for patients? 3) What kind of help do you desired or expected in your caregiving? 4) Have you ever known about this form of help, which is in-home respite care?
